# Supplementary material
Source: PubMed Central journal article supplement (PMC5543803)
Supplement: NIHMS882057-supplement-3.pdf [file NIHMS882057-supplement-3.pdf]

| P-values after Benjamini Hochberg (BH) correction |  |           |           |          |          |         |
|---------------------------------------------------|--|-----------|-----------|----------|----------|---------|
| PARAMETER                                         |  | (-4) Days | 7 Days    | 14 Days  | 21 Days  | 28 Days |
|                                                   |  | P-value   | P-value   | P-value  | P-value  | P-value |
| OtherStatistics_Duration_s                        |  | 0.1932    | 0.0025    | 0.2831   | 0.08475  | 0.1642  |
| OtherStatistics_Cadence                           |  | 0.2041    | 0.071     | 0.4329   | 0.071    | 0.2041  |
| OtherStatistics_Average_Speed_cm_per_s            |  | 0.174     | 0.005     | 0.174    | 0.174    | 0.2193  |
| OtherStatistics_NumberOfSteps                     |  | 0.6993    | 0.0015    | 0.2207   | 0.2454   | 0.2207  |
| OtherStatistics_Maximum_Variation_percents        |  | 0.362     | 0.254     | 0.5958   | 0.2655   | 0.2655  |
| RF_Stand_Mean_s                                   |  | 0.2104    | 0.0515    | 0.461    | 0.0515   | 0.2128  |
| LF_Stand_Mean_s                                   |  | 0.1634    | 0.0515    | 0.28     | 0.1537   | 0.1647  |
| RH_Stand_Mean_s                                   |  | 0.2128    | 0.1163    | 0.622    | 0.1634   | 0.159   |
| LH_Stand_Mean_s                                   |  | 0.2066    | 0.064     | 0.622    | 0.0515   | 0.1647  |
| RF_Swing_Mean_s                                   |  | 0.4047    | 0.4975    | 0.9705   | 0.8835   | 0.5698  |
| LF_Swing_Mean_s                                   |  | 0.5698    | 0.4047    | 0.9705   | 0.4047   | 0.5708  |
| RH_Swing_Mean_s                                   |  | 0.5698    | 0.7981    | 0.5698   | 0.5698   | 0.9705  |
| LH_Swing_Mean_s                                   |  | 0.8549    | 0.9705    | 0.5698   | 0.5698   | 0.5698  |
| RF_StepCycle_Mean_s                               |  | 0.168     | 0.1207    | 0.5776   | 0.168    | 0.2019  |
| LF_StepCycle_Mean_s                               |  | 0.168     | 0.1207    | 0.5142   | 0.168    | 0.168   |
| RH_StepCycle_Mean_s                               |  | 0.168     | 0.164     | 0.5142   | 0.168    | 0.168   |
| LH_StepCycle_Mean_s                               |  | 0.2071    | 0.128     | 0.7618   | 0.098    | 0.2229  |
| RF_DutyCycle_Mean_percents                        |  | 0.8759    | 0.1827    | 0.3597   | 0.1827   | 0.3597  |
| LF_DutyCycle_Mean_percents                        |  | 0.2782    | 0.1827    | 0.3597   | 0.2125   | 0.3597  |
| RH_DutyCycle_Mean_percents                        |  | 0.7473    | 0.368     | 0.9153   | 0.3836   | 0.2125  |
| LH_DutyCycle_Mean_percents                        |  | 0.3739    | 0.2125    | 0.3597   | 0.2125   | 0.2125  |
| RF_SingleStance_Mean_s                            |  | 0.5925    | 0.3408    | 0.9144   | 0.3408   | 0.7454  |
| LF_SingleStance_Mean_s                            |  | 0.3408    | 0.3408    | 0.872    | 0.9144   | 0.5543  |
| RH_SingleStance_Mean_s                            |  | 0.872     | 0.872     | 0.7454   | 0.7454   | 0.7454  |
| LH_SingleStance_Mean_s                            |  | 0.5543    | 0.9063    | 0.7454   | 0.3408   | 0.7454  |
| RF_InitialDualStance_Mean_s                       |  | 0.3085    | 0.028     | 0.291    | 0.016    | 0.09933 |
| LF_InitialDualStance_Mean_s                       |  | 0.3085    | 0.2535    | 0.5496   | 0.291    | 0.291   |
| RH_InitialDualStance_Mean_s                       |  | 0.4606    | 0.09933   | 0.2496   | 0.2496   | 0.09933 |
| LH_InitialDualStance_Mean_s                       |  | 0.3085    | 0.09933   | 0.6965   | 0.118    | 0.2535  |
| RF_TerminalDualStance_Mean_s                      |  | 0.3057    | 0.2287    | 0.6379   | 0.1303   | 0.2625  |
| LF_TerminalDualStance_Mean_s                      |  | 0.3057    | 0.034     | 0.3057   | 0.008    | 0.1303  |
| RH_TerminalDualStance_Mean_s                      |  | 0.3106    | 0.1325    | 0.7471   | 0.178    | 0.2262  |
| LH_TerminalDualStance_Mean_s                      |  | 0.3222    | 0.1303    | 0.3106   | 0.106    | 0.106   |
| RF_MaxIntensityAt_Mean_percents                   |  | 0.7317    | 0.4776    | 0.193    | 0        | 0.7317  |
| LF_MaxIntensityAt_Mean_percents                   |  | 0.4776    | 0.435     | 0.193    | 0.43     | 0.3792  |
| RH_MaxIntensityAt_Mean_percents                   |  | 0.46      | 0.859     | 0.7317   | 0.7317   | 0.001   |
| LH_MaxIntensityAt_Mean_percents                   |  | 0.4776    | 0.6391    | 0.193    | 0.3792   | 0.05667 |
| RF_MaxContactAt_Mean_percents                     |  | 0.2048    | 0         | 0.2202   | 0.2211   | 0.2674  |
| LF_MaxContactAt_Mean_percents                     |  | 0.2674    | 0.2202    | 0.3967   | 0.033    | 0.2202  |
| RH_MaxContactAt_Mean_percents                     |  | 0.9519    | 0.2202    | 0.7324   | 0.236    | 0.9519  |
| LH_MaxContactAt_Mean_percents                     |  | 0.9519    | 0.2048    | 0.03333  | 0.2202   | 0.9519  |
| RF_PrintLength_Mean_cm                            |  | 0.8326    | 0.006     | 0.8326   | 0.9908   | 0.8326  |
| LF_PrintLength_Mean_cm                            |  | 0.7118    | 0.016     | 0.7118   | 0.6937   | 0.7118  |
| RH_PrintLength_Mean_cm                            |  | 0.8326    | 0.6937    | 0.16     | 0.7118   | 0.6937  |
| LH_PrintLength_Mean_cm                            |  | 0.8326    | 0.8326    | 0.7118   | 0.8326   | 0.6937  |
| RF_PrintWidth_Mean_cm                             |  | 0.268     | 0         | 0        | 0.268    | 0.0364  |
| LF_PrintWidth_Mean_cm                             |  | 0.7286    | 0.0006667 | 0.009    | 0.7804   | 0.04127 |
| RH_PrintWidth_Mean_cm                             |  | 0.7286    | 0.0364    | 0.0052   | 0.01829  | 0.2434  |
| LH_PrintWidth_Mean_cm                             |  | 0.6811    | 0.0205    | 0.003    | 0.7804   | 0.1932  |
| RF_PrintArea_Mean_sq_cm                           |  | 0.8964    | 0         | 0.001667 | 0.06673  | 0.8964  |
| LF_PrintArea_Mean_sq_cm                           |  | 0.6024    | 5.00E-04  | 0.022    | 0.0244   | 0.8964  |
| RH_PrintArea_Mean_sq_cm                           |  | 0.6326    | 0         | 0.001667 | 5.00E-04 | 0.8964  |
| LH_PrintArea_Mean_sq_cm                           |  | 0.6024    | 0.007429  | 0.01725  | 0.2425   | 0.5245  |
| RF_MaxContactArea_Mean_sq_cm                      |  | 0.7273    | 0         | 0.002571 | 0.002571 | 0.7947  |
| LF_MaxContactArea_Mean_sq_cm                      |  | 0.4271    | 0.0025    | 0.1317   | 0.0162   | 0.762   |
| RH_MaxContactArea_Mean_sq_cm                      |  | 0.6587    | 0.002     | 0.00275  | 0        | 0.801   |
| LH_MaxContactArea_Mean_sq_cm                      |  | 0.6587    | 0.002571  | 0.01244  | 0.06091  | 0.6775  |
| RF_ManualPrintLength_Mean_cm                      |  | 0.9765    | 0.168     | 0.4336   | 0.9779   | 0.4034  |
| LF_ManualPrintLength_Mean_cm                      |  | 0.9779    | 0.4034    | 0.4034   | 0.4034   | 0.4336  |
| RH_ManualPrintLength_Mean_cm                      |  | 0.4356    | 0.9779    | 0.9779   | 0.9779   | 0.168   |
| LH_ManualPrintLength_Mean_cm                      |  | 0.4034    | 0.9779    | 0.9779   | 0.9765   | 0.6962  |
| RF_ToeSpread_Mean_cm                              |  | 0.4713    | 0         | 0.1203   | 0.9899   | 0.1203  |
| LF_ToeSpread_Mean_cm                              |  | 0.5618    | 0         | 0.0535   | 0.9341   | 0.0535  |

|                                               |  |        |         |          |           |          |
|-----------------------------------------------|--|--------|---------|----------|-----------|----------|
| RH_ToeSpread_Mean_cm                          |  | 0.368  | 0.9899  | 0.9928   | 0.9899    | 0.9716   |
| LH_ToeSpread_Mean_cm                          |  | 0.536  | 0.9899  | 0.5618   | 0.2931    | 0.9341   |
| RF_IntermediateToeSpread_Mean_cm              |  | 0.9468 | 0.101   | 0.9468   | 0.9468    | 0.9468   |
| LF_IntermediateToeSpread_Mean_cm              |  | 0.9468 | 0.068   | 0.154    | 0.9468    | 0.1732   |
| RH_IntermediateToeSpread_Mean_cm              |  | 0.9468 | 0.9468  | 0.9468   | 0.4137    | 0.9468   |
| LH_IntermediateToeSpread_Mean_cm              |  | 0.9468 | 0.1732  | 0.9468   | 0.9468    | 0.9468   |
| RF_MaxContactMaxIntensity_Mean                |  | 0.8236 | 0.0496  | 0.0496   | 0         | 0.9456   |
| LF_MaxContactMaxIntensity_Mean                |  | 0.8236 | 0.4743  | 0.8236   | 0.09267   | 0.6053   |
| RH_MaxContactMaxIntensity_Mean                |  | 0.9132 | 0.8236  | 0.4804   | 0.0496    | 0.8649   |
| LH_MaxContactMaxIntensity_Mean                |  | 0.5738 | 0.8236  | 0.4804   | 0.0496    | 0.8236   |
| RF_MaxContactMeanIntensity_Mean               |  | 0.6119 | 0.0228  | 0.009    | 0         | 0.8772   |
| LF_MaxContactMeanIntensity_Mean               |  | 0.8772 | 0.08533 | 0.2056   | 0.0006667 | 0.492    |
| RH_MaxContactMeanIntensity_Mean               |  | 0.7567 | 0.7427  | 0.089    | 0         | 0.7427   |
| LH_MaxContactMeanIntensity_Mean               |  | 0.6947 | 0.492   | 0.492    | 0.089     | 0.2572   |
| RF_MaxIntensity_Mean                          |  | 0.779  | 0.01467 | 0.04971  | 0         | 0.8953   |
| LF_MaxIntensity_Mean                          |  | 0.6028 | 0.2432  | 0.8046   | 0.04367   | 0.9756   |
| RH_MaxIntensity_Mean                          |  | 0.8953 | 0.779   | 0.2476   | 0.0185    | 0.1344   |
| LH_MaxIntensity_Mean                          |  | 0.4555 | 0.6864  | 0.07025  | 0.009     | 0.04367  |
| RF_MeanIntensity_Mean                         |  | 0.6079 | 0.0088  | 0.003    | 0.001333  | 0.8897   |
| LF_MeanIntensity_Mean                         |  | 0.7087 | 0.05686 | 0.1502   | 0.001333  | 0.4542   |
| RH_MeanIntensity_Mean                         |  | 0.9353 | 0.6079  | 0.1502   | 0.001333  | 0.5169   |
| LH_MeanIntensity_Mean                         |  | 0.5183 | 0.4542  | 0.2124   | 0.03233   | 0.4542   |
| RF_MinIntensity_Mean                          |  | 0.6975 | 0.7386  | 0.7386   | 0.6975    | 0.572    |
| LF_MinIntensity_Mean                          |  | 0.572  | 0.572   | 0.6975   | 0.7835    | 0.7386   |
| RH_MinIntensity_Mean                          |  | 0.7386 | 0.8386  | 0.7932   | 0.7835    | 0.9889   |
| LH_MinIntensity_Mean                          |  | 0.6975 | 0.8091  | 0.8724   | 0.7271    | 0.6975   |
| RF_MeanIntensityOfThe15MostIntensePixels_Mean |  | 0.835  | 0.001   | 0.006667 | 0         | 0.7995   |
| LF_MeanIntensityOfThe15MostIntensePixels_Mean |  | 0.7339 | 0.04029 | 0.3102   | 0.002667  | 0.6789   |
| RH_MeanIntensityOfThe15MostIntensePixels_Mean |  | 0.7995 | 0.3242  | 0.09689  | 0.006     | 0.5606   |
| LH_MeanIntensityOfThe15MostIntensePixels_Mean |  | 0.594  | 0.3102  | 0.09689  | 0.006     | 0.7995   |
| RF_StandIndex_Mean                            |  | 0.909  | 0.9761  | 0.493    | 0.302     | 0.445    |
| LF_StandIndex_Mean                            |  | 0.302  | 0.5273  | 0.474    | 0.4017    | 0.5273   |
| RH_StandIndex_Mean                            |  | 0.7819 | 0.9761  | 0.7819   | 0.302     | 0.4017   |
| LH_StandIndex_Mean                            |  | 0.6149 | 0.909   | 0.909    | 0.302     | 0.302    |
| RF_SwingSpeed_Mean_cm_per_s                   |  | 0.1893 | 0.009   | 0.2666   | 0.6572    | 0.334    |
| LF_SwingSpeed_Mean_cm_per_s                   |  | 0.3762 | 0.009   | 0.2889   | 0.334     | 0.334    |
| RH_SwingSpeed_Mean_cm_per_s                   |  | 0.1893 | 0       | 0.1204   | 0.1893    | 0.4017   |
| LH_SwingSpeed_Mean_cm_per_s                   |  | 0.334  | 0.004   | 0.1893   | 0.334     | 0.5373   |
| RF_BodySpeed_Mean_cm_per_s                    |  | 0.2042 | 0.011   | 0.2042   | 0.2042    | 0.2863   |
| LF_BodySpeed_Mean_cm_per_s                    |  | 0.2042 | 0.011   | 0.2042   | 0.2042    | 0.2779   |
| RH_BodySpeed_Mean_cm_per_s                    |  | 0.2042 | 0.011   | 0.2042   | 0.2042    | 0.2779   |
| LH_BodySpeed_Mean_cm_per_s                    |  | 0.2042 | 0.011   | 0.2042   | 0.2042    | 0.2546   |
| RF_BodySpeedVariation_Mean_percents           |  | 0.3731 | 0.1871  | 0.6531   | 0.2075    | 0.137    |
| LF_BodySpeedVariation_Mean_percents           |  | 0.3731 | 0.134   | 0.6286   | 0.1871    | 0.1871   |
| RH_BodySpeedVariation_Mean_percents           |  | 0.4922 | 0.137   | 0.9189   | 0.1871    | 0.2075   |
| LH_BodySpeedVariation_Mean_percents           |  | 0.3731 | 0.134   | 0.8956   | 0.2075    | 0.1871   |
| RF_PawAngleBodyAxis_Mean_degrees              |  | 0.8032 | 0.9795  | 0.8032   | 0.7971    | 0.8606   |
| LF_PawAngleBodyAxis_Mean_degrees              |  | 0.0488 | 0.073   | 0.206    | 0.4058    | 0.9499   |
| RH_PawAngleBodyAxis_Mean_degrees              |  | 0.6731 | 0.016   | 0.001333 | 0         | 0        |
| LH_PawAngleBodyAxis_Mean_degrees              |  | 0.5258 | 0.9795  | 0.5258   | 0.7971    | 0.8032   |
| RF_PawAngleMovementVector_Mean_degrees        |  | 0.788  | 0.5503  | 0.9777   | 0.2332    | 0.571    |
| LF_PawAngleMovementVector_Mean_degrees        |  | 0.0145 | 0.6838  | 0.788    | 0.5503    | 0.888    |
| RH_PawAngleMovementVector_Mean_degrees        |  | 0.888  | 0.8251  | 0        | 0.003333  | 0.003333 |
| LH_PawAngleMovementVector_Mean_degrees        |  | 0.888  | 0.888   | 0.888    | 0.6578    | 0.681    |
| BOS_FrontPaws_Mean_cm                         |  | 0.805  | 0.7874  | 0.7874   | 0.805     | 0.805    |
| BOS_HindPaws_Mean_cm                          |  | 0.8996 | 0.805   | 0.612    | 0.7257    | 0.101    |
| PrintPositions_RightPaws_Mean_cm              |  | 0.4696 | 0.1803  | 0.4696   | 0.0995    | 0.068    |
| PrintPositions_LeftPaws_Mean_cm               |  | 0.726  | 0.278   | 0.726    | 0.726     | 0.2435   |
| FP_StrideLength_Mean_cm                       |  | 0.4031 | 0.001   | 0.1103   | 0.6073    | 0.3977   |
| HP_StrideLength_Mean_cm                       |  | 0.3977 | 0       | 0.162    | 0.5642    | 0.3977   |
| StepSequence_NumberOfPatterns                 |  | 0.4893 | 0.003   | 0.042    | 0.2818    | 0.3382   |
| StepSequence_CA_percents                      |  | 0.5379 | 0.5379  | 0.5643   | 0.5541    | 0.7675   |
| StepSequence_CB_percents                      |  | 0.2983 | 0.5842  | 0.4994   | 0.7675    | 0.9087   |
| StepSequence_AA_percents                      |  | 0.6747 | 0.6367  | 0.5379   | 0.135     | 0.6367   |
| StepSequence_AB_percents                      |  | 0.5643 | 0.6747  | 0.5643   | 0.0675    | 0.6597   |
| StepSequence_RA_percents                      |  | 1      | 0.6035  | 1        | 1         | 1        |
| StepSequence_RB_percents                      |  | NA     | NA      | NA       | NA        | NA       |

|                                      |        |         |        |         |         |
|--------------------------------------|--------|---------|--------|---------|---------|
| StepSequence_RegularityIndex_percent | 0.5369 | 0.4698  | 0.4698 | 0.5369  | 0.4698  |
| PhaseDispersions_RF_LH_Mean          | 0.9467 | 0.1475  | 0.1886 | 0.043   | 0.5199  |
| PhaseDispersions_LF_RH_Mean          | 0.9467 | 0.4646  | 0.9467 | 0.9467  | 0.4016  |
| PhaseDispersions_LH_RH_Mean          | 0.7171 | 0.9467  | 0.9467 | 0.7171  | 0.9467  |
| PhaseDispersions_LF_RF_Mean          | 0.3496 | 0.5342  | 0.9378 | 0.1245  | 0.1475  |
| PhaseDispersions_RF_RH_Mean          | 0.7171 | 0.223   | 0.2356 | 0.039   | 0.3496  |
| PhaseDispersions_LF_LH_Mean          | 0.4476 | 0.803   | 0.2356 | 0.043   | 0.1757  |
| PhaseDispersions_RF_LH_CStat_Mean    | 0.9631 | 0.1072  | 0.3549 | 0.0435  | 0.8748  |
| PhaseDispersions_LF_RH_CStat_Mean    | 0.4133 | 0.8748  | 0.7286 | 0.1072  | 0.4042  |
| PhaseDispersions_LH_RH_CStat_Mean    | 0.7567 | 0.723   | 0.4687 | 0.5915  | 0.8748  |
| PhaseDispersions_LF_RF_CStat_Mean    | 0.321  | 0.4687  | 0.4687 | 0.1725  | 0.4042  |
| PhaseDispersions_RF_RH_CStat_Mean    | 0.5962 | 0.1963  | 0.321  | 0.012   | 0.3549  |
| PhaseDispersions_LF_LH_CStat_Mean    | 0.3551 | 0.4133  | 0.2858 | 0.1725  | 0.3382  |
| PhaseDispersions_RF_LH_CStat_R       | 0.9778 | 0.2356  | 0.2274 | 0.9778  | 0.1504  |
| PhaseDispersions_LF_RH_CStat_R       | 0.9778 | 0.2713  | 0.9656 | 0.9778  | 0.9656  |
| PhaseDispersions_LH_RH_CStat_R       | 0.9656 | 0.1495  | 0.9305 | 0.1495  | 0.155   |
| PhaseDispersions_LF_RF_CStat_R       | 0.7751 | 0.2356  | 0.9778 | 0.4166  | 0.2356  |
| PhaseDispersions_RF_RH_CStat_R       | 0.9305 | 0.1495  | 0.9656 | 0.1495  | 0.1495  |
| PhaseDispersions_LF_LH_CStat_R       | 0.9305 | 0.1495  | 0.9808 | 0.9656  | 0.1504  |
| Couplings_RF_LH_Mean                 | 0.6085 | 0.7228  | 0.698  | 0.218   | 0.9225  |
| Couplings_LF_RH_Mean                 | 0.6085 | 0.9288  | 0.9567 | 0.218   | 0.9567  |
| Couplings_LH_RF_Mean                 | 0.5953 | 0.6694  | 0.6694 | 0.6085  | 0.9854  |
| Couplings_RH_LF_Mean                 | 0.5815 | 0.8202  | 0.9288 | 0.698   | 0.9924  |
| Couplings_LH_RF_Mean                 | 0.6257 | 0.698   | 0.6694 | 0.4592  | 0.7228  |
| Couplings_LF_RF_Mean                 | 0.4592 | 0.6257  | 0.6694 | 0.0864  | 0.5375  |
| Couplings_RH_LH_Mean                 | 0.698  | 0.8618  | 0.6085 | 0.7625  | 0.8202  |
| Couplings_RF_LF_Mean                 | 0.5815 | 0.5815  | 0.6343 | 0.218   | 0.7228  |
| Couplings_RF_RH_Mean                 | 0.6728 | 0.218   | 0.4592 | 0.026   | 0.4592  |
| Couplings_LF_LH_Mean                 | 0.6085 | 0.7228  | 0.3588 | 0.0855  | 0.4592  |
| Couplings_RH_RF_Mean                 | 0.6694 | 0.5063  | 0.5375 | 0.026   | 0.6728  |
| Couplings_LH_LF_Mean                 | 0.6085 | 0.9977  | 0.5375 | 0.018   | 0.7228  |
| Couplings_RF_LH_CStat_Mean           | 0.8116 | 0.054   | 0.4758 | 0.054   | 0.8252  |
| Couplings_LF_RH_CStat_Mean           | 0.4758 | 0.8205  | 0.8314 | 0.4372  | 0.4372  |
| Couplings_LH_RF_CStat_Mean           | 0.8622 | 0.4372  | 0.4372 | 0.036   | 0.9296  |
| Couplings_RH_LF_CStat_Mean           | 0.3844 | 0.8128  | 0.7011 | 0.1053  | 0.8205  |
| Couplings_LH_RH_CStat_Mean           | 0.4917 | 0.6043  | 0.5874 | 0.3844  | 0.7609  |
| Couplings_LF_RF_CStat_Mean           | 0.3692 | 0.4372  | 0.5048 | 0.05829 | 0.4372  |
| Couplings_RH_LH_CStat_Mean           | 0.6368 | 0.8532  | 0.4461 | 0.9296  | 0.6043  |
| Couplings_RF_LF_CStat_Mean           | 0.4372 | 0.4372  | 0.4917 | 0.1816  | 0.5954  |
| Couplings_RF_RH_CStat_Mean           | 0.5874 | 0.1816  | 0.3844 | 0.018   | 0.3844  |
| Couplings_LF_LH_CStat_Mean           | 0.4372 | 0.4461  | 0.289  | 0.1053  | 0.4372  |
| Couplings_RH_RF_CStat_Mean           | 0.5874 | 0.4073  | 0.4372 | 0.009   | 0.5874  |
| Couplings_LH_LF_CStat_Mean           | 0.4917 | 0.8816  | 0.4372 | 0.009   | 0.6969  |
| Couplings_RF_LH_CStat_R              | 0.9404 | 0.336   | 0.3439 | 0.9713  | 0.24    |
| Couplings_LF_RH_CStat_R              | 0.9999 | 0.311   | 0.9999 | 0.9713  | 0.797   |
| Couplings_LH_RF_CStat_R              | 0.8686 | 0.4514  | 0.7812 | 0.9999  | 0.3439  |
| Couplings_RH_LF_CStat_R              | 0.8361 | 0.2929  | 0.9713 | 0.8686  | 0.9815  |
| Couplings_LH_RH_CStat_R              | 0.797  | 0.2089  | 0.8686 | 0.2856  | 0.2954  |
| Couplings_LF_RF_CStat_R              | 0.7605 | 0.3603  | 0.9999 | 0.3628  | 0.336   |
| Couplings_RH_LH_CStat_R              | 0.9479 | 0.2089  | 0.9713 | 0.9404  | 0.2089  |
| Couplings_RF_LF_CStat_R              | 0.9713 | 0.2089  | 0.8686 | 0.2589  | 0.8361  |
| Couplings_RF_RH_CStat_R              | 0.8139 | 0.2089  | 0.9713 | 0.2089  | 0.2089  |
| Couplings_LF_LH_CStat_R              | 0.8284 | 0.2089  | 0.9815 | 0.8545  | 0.2089  |
| Couplings_RH_RF_CStat_R              | 0.9713 | 0.2145  | 0.9713 | 0.9713  | 0.2089  |
| Couplings_LH_LF_CStat_R              | 0.9253 | 0.2089  | 0.9253 | 0.7605  | 0.7605  |
| Support_Zero_percent                 | 0.8141 | 0.8141  | 1      | 1       | 1       |
| Support_Single_percent               | 0.5592 | 0.2582  | 0.4475 | 0.4475  | 1       |
| Support_Diagonal_percent             | 0.5592 | 0.06475 | 0.8141 | 0.1546  | 0.252   |
| Support_Girdle_percent               | 0.2751 | 0.3663  | 0.9839 | 1       | 0.8961  |
| Support_Lateral_percent              | 0.5316 | 0.6841  | 0.186  | 0.0315  | 0.8844  |
| Support_Three_percent                | 0.3465 | 0.0833  | 0.5176 | 0.0175  | 0.4475  |
| Support_Four_percent                 | 1      | 0.4589  | 0.9524 | 0.4589  | 0.05483 |
